1 **“I told myself, be bold and go and test”: Motivators and barriers to HIV testing**  
2 **among gays, bisexuals, and all other men who sex with men in Ghana – West Africa**

3 Gamji Rabiou Abu-Ba’are<sup>1235</sup>, Gloria Aidoo-Frimpong<sup>3</sup>, Melissa Stockton<sup>4</sup>, Edem Yaw  
4 Zigah<sup>56</sup>, Samuel Amuah<sup>7</sup>, Prince Amu-Adu<sup>6</sup>, Richard Panix Amoh-Otoo<sup>7</sup>, Laura Nyblade<sup>8</sup>,  
5 Kwasi Torpey,<sup>9</sup> LaRon E. Nelson<sup>3,10</sup>.

6 **Affiliation**

- 7 1. Behavioral, Sexual and Global Health Lab, School of Nursing, University of  
8 Rochester Medical Center, University of Rochester, Rochester New York
- 9 2. Department of Public Health Sciences, University of Rochester Medical Center,  
10 University of Rochester, Rochester New York
- 11 3. Yale AIDS Prevention Program (Y-APT), Center for Interdisciplinary Research on  
12 AIDS, School of Public Health/Medicine, Yale University, New Haven, CT
- 13 4. Department of Epidemiology, Gillings School of Global Public Health, University of  
14 North Carolina at Chapel Hill, Chapel Hill, NC
- 15 5. Behavioral, Sexual and Global Health Lab, West Africa Site, Jama’a Action, West  
16 Legon, Accra, Ghana
- 17 6. Priorities on Rights and Sexual Health, Accra, Ghana,
- 18 7. Youth Alliance for Health and Human Rights, Kumasi, Ghana
- 19 8. RTI International, 701 13th Street NW., #750, Washington DC 20005, USA
- 20 9. Department of Population, Family & Reproductive Health, School of Public Health,  
21 University of Ghana, Legon-Accra, Ghana
- 22 10. School of Nursing, Yale University, New Haven CT, USA
- 23

24 **Abstract**

25 Limited evidence from Ghana and SSA shows that despite consistently a  
26 disproportionately high burden of HIV, GBMSM infrequently often delay testing until the  
27 point of illness. We therefore used qualitative interviews to collect insights of experiences,  
28 motivators, and barriers to HIV testing among GBMSM. Two community-based  
29 organizations used snowball and convenience sampling to recruit 10 MSM for IDIs and 8  
30 to 12 for FGDs. We transcribed, coded, identified and analyzed the relationship and  
31 commonalities between the participants' responses. Under experiences with testing, 1)  
32 fear of HIV infection created a stressful HIV testing experience; and 2) friendly and  
33 supportive healthcare environment facilitated a positive experience in healthcare  
34 facilities. Motivators or facilitators of testing include: 1) the perception or belief that HIV  
35 testing is a HIV prevention strategy; 2) encouragement from friends and peers; 3)  
36 understanding risk associated with certain sexual behaviors such as transactional sex 4)  
37 education or information on HIV; 5) access to free testing and incentives; 6) early  
38 symptoms and provider recommendation. Barriers to HIV testing include: 1) negative  
39 community perceptions of HIV deter; 2) individual-level low risk perception or indifference  
40 about HIV infection; 3) location and cost; 4) inadequate testing availability; 5) Stigma at  
41 Healthcare facilities. The findings point to the need to address important issues around  
42 stigma, education, peer support and healthcare resources through interventions and  
43 research to improve HIV testing among GBMSM in the country.

44

45

46

## 47 **Introduction**

48 Gays, bisexuals, and all other men who sex with men (GBMSM) are at heightened risk  
49 for HIV.[1, 2] As of 2021, GBMSM have 28 times the risk of acquiring HIV compared to  
50 heterosexual men.[3] In Ghana, 17.1% of GBMSM are estimated to be living with HIV;  
51 further, Ghanaian GBMSM, along with other key populations, disproportionately account  
52 for new HIV infections.[4]. Ghana and other SSA, with the aid of international health  
53 organizations and programs have begun to focus on improving HIV outcome among key  
54 populations [1-5]. Yet several factors such as low HIV knowledge, condomless anal sex,  
55 discrimination and criminalization, and social isolation continue to hinder HIV prevention  
56 and care among GBMSM [1-10].

57

58 At the GBMSM level, limited studies in Ghana show that majority of GBMSM in the country  
59 have lower understanding of HIV prevention, and treatment processes [10-14]. For  
60 instance, a study among 137 GBMSM showed low mean scores for knowledge on STI  
61 and HIV transmission, prevention, and treatment [14]. As such, there is lower use of  
62 prevention tools such as condoms, lubricants and HIV testing, and in some cases, limited  
63 adherence to medication. For instance, condom use was higher when GBMSM had  
64 vaginal sex with women, (rel. f. = 0.75) than anal sex with men (rel. f. = 0.50) [14]. About  
65 40% of did not use condoms during first sexual encounters, and even less (38%)  
66 continuously used condoms with sexual partners [14]. These increased risk behaviors  
67 and high HIV prevalence among GBMSM shows the need for increased HIV testing [10-  
68 16].

69

70 Regular HIV testing is key to both HIV prevention and linkage to care; HIV testing allows  
71 GBMSM to be aware of their HIV status, facilitating sexual-health decision making,  
72 access to vital prevention services such a pre-exposure prophylaxis (PrEP), as well as  
73 initiation of ART, improvement in HIV morbidity and mortality.[11, 12] While HIV testing  
74 practices are slowly increasing among GBMSM in Africa,[2, 19] there is a need to  
75 understand the factors the affect HIV testing behaviors for this vulnerable group, and to  
76 begin to address such factors [15,16].

77  
78 In addition to low HIV knowledge, and access to HIV prevention and care services, high  
79 HIV and sexual stigma and discrimination affect HIV testing among GBMSM [15,16].  
80 Recognizing the centrality of stigma in HIV testing practices, this study employs the  
81 Health Stigma and Discrimination Framework (HSDF) to unpack GBMSM's experiences  
82 across the socio-ecological model.[20] HSDF posits that the stigmatization process  
83 unfolds across the socio-ecological spectrum in the context of a health condition, such as  
84 HIV care, and ultimately impacting uptake of testing, adherence and treatment, incidence,  
85 morbidity and mortality among affected groups [20]. Consistent with the HSDF,  
86 Ghanaians in general have high misconception of HIV and treatment, and view HIV like  
87 a death sentence, hence, many GBMSM have fear of a positive diagnosis.[4, 9-16].  
88 Further, same-sex sexual behaviors can be treated as criminal in Ghana and a recent  
89 national anti-LBGTQ political rhetoric hamper both service delivery and engagement in  
90 HIV prevention programming [21, 22]. As such, GBMSM face stigma at the community  
91 level and health care facility levels, which can manifest in the form of gossip, verbal and  
92 physical abuse, blame, shame and ultimately poor-quality of healthcare services.[9, 10,

93 23]. All these manifestations of stigma occur at higher levels for GBMSM who also have  
94 gender non-conforming expressions (example, men who act it in ways that will be  
95 considered feminine in the Ghanaian context), not only from community but healthcare  
96 providers, but at the interpersonal level between GBMSM peers [9, 10, 23].

97  
98 The internalization of stigma associated with HIV, sexual status, and gender expressions,  
99 can combine with limited HIV knowledge and other factors to reduce interest in HIV  
100 testing, prevention and care services among GBMSM. Yet, there is limited research on  
101 the HIV prevention experiences of GBMSM or into the factors that motivate or hamper  
102 HIV testing behaviors among GBMSM in Ghana. A better understanding of these factors  
103 may facilitate access to comprehensive HIV prevention services and ultimately reduce  
104 disparities in HIV testing and incidence.[2] This qualitative study therefore, uses the  
105 lenses of the HSDF to understand HIV testing experiences of Ghanaian GBMSM, and  
106 factors that motivate or block willingness to test for HIV.

## 107 **Methodology**

### 108 **Design**

109 This study constitutes a part of a formative phase for a randomized controlled trial (RCT)  
110 that aims to assess the feasibility, acceptability, and potential effect size of a multi-level  
111 intervention to reduce intersectional HIV, gender nonconformity, and sexual stigma and  
112 to increase HIV testing among GBMSM in Ghana.[12] Here, we provide a summary report  
113 of the study approach, a detailed description has been published elsewhere [10-12]  
114 The assessment phase reported in this paper used a multi-method phenomenological  
115 approach, which combined focus group discussions (FGD) and in-depth interviews (IDI)

116 to understand experiences of HIV testing among GBMSM in Ghana. The FGDs included  
117 questions pertaining to HIV testing experiences, motivators and facilitators to HIV testing,  
118 barriers to HIV testing at the intra and interpersonal levels, community levels, and  
119 healthcare facility level. In addition to the FGD questions, the IDI also inquired about  
120 positive and negative experiences around HIV testing and diagnoses.

121

### 122 **Sampling and Data Collection**

123 Two GBMSM-led community partners in Accra and Kumasi employed a combination of  
124 convenience and snowball sampling to recruit GBMSM in Ghana. FGD participants were  
125 18 years or older, male at birth, self-identified as men, and had sex with other men within  
126 the previous six months. In addition, in-depth interview (IDI) participants also self-  
127 disclosed that they were living with HIV. The interviewers were individuals from the  
128 partner organizations who self-identified as gay and bisexual men from the respective  
129 cities and had received a data collection and human subject research training. They  
130 invited GBMSM to participate in the IDIs and FGDs at their respective organizations. Eight  
131 FGDs and 10 IDIs were conducted. Both the IDIs and FGDs were primarily conducted in  
132 English, although two FGDs were conducted in Twi. The interviewers digitally recorded  
133 and transcribed all IDIs and FGDs. The research team reviewed both English and Twi  
134 audio files to ensure consistency. The research team reviewed the first several IDIs,  
135 provided the interviewers' feedback, and revised the interview guides as necessary.

136

137 **Ethical Approval.** The institutional review boards of Yale University, Noguchi Medical  
138 Research Institute, the Ghana Health Service, and the University of Toronto approved the

139 study. All study participants signed an informed consent form and received a token for  
140 their participation. Only community level partners had direct access to participants, they  
141 only provided aggregated data without any information for coding and analysis. Hence,  
142 no information harmful to participants is accessible to any co-authors in this manuscript.

143

#### 144 **Data analysis**

145 Seven members from the research team and partner organizations coded the data line  
146 by line. First, all members reviewed the transcripts to identify relevant concepts which  
147 informed the construction of a code book. Using the code book, two coders independently  
148 coded the same transcripts and compared their codes to reach a consensus in terms of  
149 discrepancies in a meeting. We then combined all codes into broad classifications of  
150 participants' experiences and perspectives. The research team examined the resulting  
151 groups of codes across all transcripts and reviewed to confirm their comprehensiveness  
152 and representation.

#### 153 **Results**

154 We identified and analyzed the relationship and commonalities between the participants'  
155 responses to understand HIV testing experiences of GBMSM, and factors that motivate  
156 or block willingness to test for HIV. Under experiences with testing, 1) fear of HIV infection  
157 created a stressful HIV testing experience; and 2) friendly and supportive healthcare  
158 environment facilitated a positive experience in healthcare facilities. The following factors  
159 served as motivators for or facilitated testing: 1) the perception or belief that HIV testing  
160 is a HIV prevention strategy; 2) encouragement from friends and peers; 3) understanding  
161 risk associated with certain sexual behaviors such as transactional sex 4) education or

162 information on HIV; 5) access to free testing and incentives; 6) early symptoms and  
163 provider recommendation. We also identified the following barriers to HIV testing: 1)  
164 negative community perceptions of HIV deters; 2) individual-level low risk perception or  
165 indifference about HIV infection; 3) location and cost; 4) inadequate testing availability; 5)  
166 Stigma at Healthcare facilities.

### 167 **Experiences of HIV Testing**

168 1) Fear of HIV infection created a stressful HIV testing experience.

169 Many FGDs participants described their experiences of the testing process and their  
170 feelings while getting tested. A few participants described the process as quite  
171 "traumatic", and scary as they were unsure about what the test results will be. One  
172 participant reflected on his experience, "I could remember when I went to do my HIV test;  
173 it was very scary; I was like "wow ooh my gosh! What if I am HIV positive? What will  
174 happen next?" So when I did my test the results didn't even come, but I was crying; I was  
175 crying and I was so scared because I was like "Eish! so if I am HIV positive would I die?  
176 I would die because I can't take medicine for the rest of my life" A whole lot was on my  
177 mind. Even within that five to ten minute, I was sweating because I didn't know what the  
178 results would turn out to be, so I was like "wow Oh God help me, don't let it be that I am  
179 HIV positive" So you know it was like a whole lot." (FGD 1) The rest of his group echoed  
180 this sentiment. Another participant shared, "Being HIV positive is not something you  
181 should be happy with, so when I was going for the test I was having this panic attacks  
182 and anxiety" (IDI3)

183 2) Friendly and supportive healthcare environment facilitated a positive experience in  
184 healthcare facilities



185 Participants highlighted the positive experiences associated with their testing experiences  
186 in both public and private facilities. Privacy and free testing were identified as central to  
187 their positive experiences: "there wasn't an obstacle because HIV test is free." (FGD 1).  
188 Others shared that the process of testing was quite easy, with nurses being friendly and  
189 "treating them equally." Conversations with healthcare providers served as a source of  
190 encouragement and comfort to participants, helping them to realize and understand their  
191 risk of an infection. One participant reflected: "Because I was having these few friends  
192 and they sometimes do meetings and they sometimes bring nurses and we talk about  
193 HIV and stuff and they realize . . . they [Nurses] made us know that we are really at risk.  
194 So, it prompted me to give it a chance to do the test"

#### 195 **Motivators and Facilitators of HIV testing**

196 Participants who had tested for HIV discussed their reasons for getting an HIV test.  
197 Participants highlighted peer influence, their sexual orientation, sexual behaviors,  
198 receiving information about HIV, work requirements, and having symptoms as the  
199 significant reasons for testing.

200 1) Perception of HIV testing as a prevention strategy served as a motivator for testing.  
201 Most of the participants had tested for HIV, with a few participants revealing that their  
202 most recent test was a week prior to the FGD. There were differing opinions related to  
203 HIV testing for prevention. Some participants were convinced that based on their lifestyle  
204 as GBMSM, they were more at risk of contracting HIV; thus, it was imperative that they  
205 know their HIV status: "As a sexually active person and an MSM, am at a very higher  
206 risk... So anytime I get the chance I want to test." (FGD 1)

207 Participants shared that testing provided peace of mind and helped protect themselves  
208 and others within their networks from being infected. One participant mentioned: "I think  
209 the very best thing that could happen to someone who is MSM is to test for HIV like in  
210 very simple and short words. That's what I tell people because once you know yourself  
211 and you know the risk you get exposed to once a while or you know your identity, the best  
212 thing for you is to test for HIV." (FGD3)

213 2) Encouragement from friends and peers serve as a motivator for testing.

214 Participants had overall positive experiences of peer support. Getting tested resulted from  
215 the encouragement and support from their peers. This support included providing  
216 information about HIV, sharing their own testing experiences, accompanying them to get  
217 tested at the healthcare facility. One participant shared, "A friend of mine who had gone  
218 in to test his HIV status encouraged me to also test and know my status." (FGD2). Another  
219 participant explained: "I have friends who are peer educators and they kept telling me that  
220 I should come so in the world AIDS day two years ago I tested" (FGD1)

221 3) Understanding risk associated with sexual behaviors such as transactional sex  
222 served as a motivator for testing.

223 Testing for HIV, according to a few participants, was a critical need for GBMSM.  
224 Participants believed that they had a greater biological risk of HIV acquisition because of  
225 anal sex, thus being or identifying as GBMSM was enough of a reason to get tested:  
226 "Once you have accepted you are an MSM, you need to check your status. I'm saying  
227 this because if heterosexuals are getting tested to know their status so why not you the  
228 MSM. I believe as MSM we should get tested." (FGD 3). Another participant also  
229 described the perceived risk of being GBMSM and the need to get tested: "So as an MSM

230 person living, it's always good for you to at least go for your test every three months or  
231 every six months because you yourself know that you are doing something that puts you  
232 at risk. So, your life is always at risk." (IDI 4)

233 Similarly, other men acknowledged this sentiment and highlighted that other sexual  
234 behaviors of GBMSM such concurrent partnerships put them at risk, thus necessitating  
235 consistent HIV testing. One participant shared his thoughts: "I don't have one sexual  
236 partner. I have multiple sexual partners and as a guy or as an GBMSM having multiple  
237 sexual partners, I think it's better for me to test to know my status." (FGD3).

238 Other participants also revealed that a preference for unprotected sex served as a  
239 motivating factor to get tested: "What helps me to always get tested is because I always  
240 know that I am an GBMSM and sometimes I do love to have unprotected sex, so I always  
241 like to go for testing at least every three months." (FGD2)

242 Transactional sex, which serve as a source of income for some participants, was  
243 discussed as a reason to get tested. Participants who engaged in transactional sex  
244 described HIV testing as a way of protecting themselves and their clients. A participant  
245 explained why being involved in sex work required that they get tested often: "I got tested  
246 because of my job (sex work) Yes, I see it as job because I and some friends that I know  
247 depends on this to survive. Many of us don't work so exchanging sex for money is what  
248 keeps us moving." (FGD 1). Another participant expressed his support by saying "I know  
249 the kind of job I do and I have no plans of stopping anytime soon. So, I think frequent  
250 testing is key" (FGD1)

251 Perceived partner unfaithfulness also motivated HIV testing. Few participants highlighted  
252 the lack of trust in their partners as a factor that motivated them to test regularly: "I have

253 a partner and I don't trust him for being faithful, so testing is important to me as an  
254 GBMSM." (FGD 3)

255 4) Education/Information on HIV motivated participants to test.

256 Receiving information on HIV through peer navigators, clinics, and health fairs was critical  
257 to HIV testing among the participants. Many of the FGD participants shared that they  
258 ultimately decided to test after receiving simple, but detailed information about HIV  
259 transmission and risk. "At first, I didn't want to test, but I changed my mind when I had  
260 education from a peer educator. That's how I had my first test." (FGD 1).

261 5) Access to free testing and incentives facilitated testing

262 Monetary incentives added to free testing opportunities also viewed was a critical  
263 motivator for testing: "I think it was a research program or something like that and there  
264 was money involved, I think they were giving ₦30.00 or something and I wanted to get  
265 the money and I got there and I was tested" (FGD 1). Another participant shared "I got  
266 tested because I wanted the 40 cedis trust me, it's the truth I'm telling you" (FGD2)

267 6) Early symptoms and provider recommendations facilitated testing

268 Receiving a recommendation or instructions from a healthcare provider to test for HIV  
269 was critical to HIV testing decision-making. A few individuals described deciding to test  
270 per their doctor's recommendation: "The doctor said I should go and do it so I just decide  
271 to do it." (FGD 2). For others, the recommendation was related to an undiagnosed  
272 disease, with the doctors suggesting an HIV test as a last resort. A participant shared:  
273 "So there was a time the doctors were not figuring what was the sickness. So one of the  
274 doctors told me to go and run an HIV test. So I went [to get tested]." FGD 4

275 Experiencing symptoms such as fevers, general body weakness, weight loss, loss of  
276 appetite, headaches, rashes on the body, and discharges from the penis prompted some  
277 of the men to get tested: "Sometimes I take my bath and my body itches me; That alone  
278 was enough for me, and I felt like I was also losing weight a bit. Though I am not the fat  
279 type, but I felt I lost weight a little bit. Somebody would sometimes see you and would act  
280 like "are you sick?" and that kind of stuff so it alerted me and it made me feel like okay let  
281 me go and test and see why I am having this kind of feeling. That's the reason why." (FGD  
282 2). Another participant also explained why they got tested: "And you know once in a while  
283 you feel some rashes and you feel a bit sick and that kind of stuff and sometimes you feel  
284 like you have lost appetite and those kinds of things. So I really wanted to test so that I  
285 would really see what is really wrong with me." (IDI2) Another participant also shared the  
286 symptoms they had which encouraged them to go get tested: "I had a discharge from my  
287 penis and headache" (IDI3).

288 A few participants shared that they got tested due to work policies or as an entry  
289 requirement for certain occupations such as the military and nursing school; as one  
290 participant mentioned: "Because of the nature of my work, I have to get tested. I am a  
291 caterer." (FGD 2). Another participant described their experience with these mandatory  
292 testing policies: "Well it's the school's policy, so you have to do it whether you like it or  
293 not. Before you go to nursing school you have to go for a medical report, just for you to  
294 be fit for the training school. So I got tested last two years. I was like, this thing would  
295 come out and what if I'm positive? Because I had never tested myself before, so I was  
296 thinking a lot, but it came out that I was not reacting. I was like "Hurray!" (FGD 4)  
297 Barrier to HIV testing

298 1) Negative Community perceptions of HIV deters testing

299 Participants discussed how community understanding of HIV is critical to prevention  
300 needs. HIV as a disease was usually associated with immoral behaviors, as a punishment  
301 for deviant behaviors related to sex or contracted by only certain groups such as MSM or  
302 commercial sex workers. Participants discussed that these prevalent community beliefs  
303 about HIV led to stigma, which they revealed impacted prevention activities such as  
304 testing. One participant reflected: "They say it's [HIV] a satanic disease; you got this  
305 disease from fornication and whoring, and all sorts of stuff. On my first day I told myself  
306 "Yaw! Be bold and go and test, if you are negative then you are negative, and if you are  
307 positive, you know what to do." (FGD2) Another participant described, "In my community,  
308 they talk bad about HIV especially when you are gay. They say it is MSM or gays who  
309 usually get infected with this kind of disease. So they talk bad about that HIV." FGD 4

310 2) Individual level low risk perception / indifference about HIV infection hinders testing

311 In a world of competing health risks, some participants did not perceive HIV to carry a  
312 severe health risk. A few FGD participants believed that many other diseases could kill  
313 them, thus, there was no need for the extra focus on HIV. One participant explained, "Let  
314 me say, I am not interested in testing or I have never tested or nothing because as I said  
315 I work in the health sector and my philosophy in life is that, all die be die cos working in  
316 the health sector and looking at the things that are killing people in Ghana, HIV is not top  
317 10 killer disease". The most killer disease is RTA, Road Traffic Accidents or malaria those  
318 days so I don't see myself bothering about HIV or whatever like to me I am in the hospital,  
319 I don't, if HIV will kill you, it will kill you for even recently corona [COVID-19] is in and its

320 killing people so what's the big deal, you understand it. HIV is still there so I don't, I have  
321 never tested and I don't think I will ever test." (FGD3)

322 3) Distance and transportation cost as barriers to HIV testing

323 The cost of transportation to the centers to get tested served as a barrier to getting tested.  
324 Participants discussed that since testing was free, the challenge usually involved paying  
325 for travel to the health centers. One participant explained: "I will say transportation will be  
326 the only cost but there were no charges at the facility. And it was free. All I need to do is  
327 to be at the facility and the test will be done. So, the only cost will be moving from my  
328 home to the facility to get tested." (FGD 3).

329 4) Inadequate testing availability

330 Shortage and inadequate testing kits were highlighted as barriers to testing by some  
331 participants. Participants mentioned that despite their readiness to get tested, there was  
332 a lack of testing kits available at the facilities they visited over multiple months. A  
333 participant revealed: "It was the shortage of test kits ...I went to the facility and I was told  
334 there wasn't any test kit." (FGD 2).

335 5) Healthcare level sexual stigma deters GBMSM from testing for HIV

336 Some FGD participants discussed the lack of MSM-friendly nurses and stigma in the form  
337 of healthcare providers' demeaning comments towards MSM because of their  
338 engagement in same-gender partnerships and sexual activities. A participant described  
339 their experience: "I think there was this one facility that my partner and I visited at that  
340 time. I heard some comments from one of the nurses that made me felt uncomfortable so  
341 we refused to get tested at that time so we had to leave... One of the nurses said your  
342 people are here so the friendly nurse responded I know. So, she added how can a nice

343   guy like this be Gay?" (FGD 2). Another person recounted; "the health provider told him  
344   straight away, do you do men? All of a sudden he was thrown aback, why you ask such  
345   a question because it is not only MSM who contract HIV. So he tried to question the health  
346   provider and the health provider said that immediately I saw you I knew you were one of  
347   them". They come here all the time and we test them, I know how they behave."  
348   FGD4Others added they do not to go to facilities with no friendly providers; "I know a lot  
349   of HIV testing sites that are not MSM friendly because they were not having friendly  
350   Nurses. I had to move from my place to another place for the HIV test." IDI 5

351   “

## 352   Discussion

353         Limited evidence from Ghana and SSA shows that despite consistently a  
354   disproportionately high burden of HIV, GBMSM infrequently test for HIV and often delay  
355   testing until the point of illness [22-26]. This study therefore provides qualitative insights  
356   of experiences, motivators, and barriers to HIV testing among GBMSM. The findings point  
357   to important issues around stigma, education, peer support and healthcare resources that  
358   affect HIV testing and can inform intervention to increase testing among GBMSM in the  
359   country.

360         We established that stigma associated with HIV, and same-sex intercourse  
361   increases negative experiences with testing and dissuade GBMSM from testing.  
362   Consistent with the Health Stigma and Discrimination Framework (HSDF), accounts of  
363   participants show how intersectional stigma at the healthcare-, community-, and  
364   individual-levels affects testing experiences and discourage GBMSM from testing [20,  
365   27]. At the community-level, GBMSM recount the association of HIV with sin, same-sex



366 intercourse and sex work; at the healthcare level they experience negative comments  
367 such as gossips, and insults around sexual behavior. The accounts by participants  
368 corroborates the limited findings in Ghana and West Africa that show community level  
369 HIV and same-sex intercourse stigma as factors that affect HIV testing among GBMSM  
370 in the region [10, 23, 28]. As explained by the HSDF and previous findings, participants  
371 in this study internalized the stigma and begin to develop fear for HIV, thus experiencing  
372 stress during HIV testing, and or avoid testing in its totality [10, 23, 28].

373         Despite the negative effects of stigma, we found that positive healthcare  
374 environment can provide better experiences and encourages HIV testing among  
375 GBMSM. Participants who reported positive experience with testing mentioned the  
376 professionalism and confidentiality of providers at the testing sites as factors that  
377 contributed to their positive experience. Likewise, those who avoid testing sites  
378 mentioned that stigma from providers prevent them from testing. Our findings on positive  
379 healthcare environment as a facilitator for testing confirms findings among GBMSM  
380 elsewhere [29,30]. It also explains reported GBMSM preference for friendly and GBMSM  
381 led healthcare facilities, compared to government facilities where stigma appear more  
382 rampant [32, 32]. We therefore reaffirm the importance of implementing interventions that  
383 seek to alter stigma and negative experiences of GBMSM in public healthcare facilities,  
384 to increase HIV testing [12, 13, 23].

385         Our findings also point to the importance of increasing education and proper  
386 information channeling to GBMSM in Ghana to increase HIV testing. The participants who  
387 expressed understanding of HIV risk associated with same-sex intercourse, HIV  
388 transmission, and the role of HIV testing mentioned those as factors that informed their

389 decision to test for HIV. Conversely, participants who expressed a lack of awareness,  
390 individual level low risk perception and or indifference about HIV infection did not test for  
391 HIV. Whereas limited interventions or studies focused on GBMSM in Ghana and sub-  
392 Saharan African countries, we previously implemented an adapted Many Men Many  
393 Voices intervention in Ghana that addressed knowledge and capacity around HIV risk,  
394 transmission, prevention and care among GBMSM [13, 15, 33]. The findings of this study  
395 support our initial evidence from the Many Men Many Voices intervention that showed  
396 that HIV testing and readiness to test for HIV increased after receiving education and  
397 information around HIV [13, 15, 33]. Similar findings appeared in some other studies in  
398 different parts of West African and SSA regions [34, 35].

399         Moreover, per our findings, peers can serve as promoters of HIV testing among  
400 GBMSM. As evidenced in this study, some participants tested for HIV because they were  
401 referred to testing by their friends and acquaintances, as well as peer educators who  
402 reach out to GBMSM to encourage testing. These findings confirm studies elsewhere  
403 where by a peer support intervention implemented among GBMSM contributed to  
404 address individual level challenges and increasing HIV testing [35,37].

405         Additionally, whereas there have been recent efforts through several programs to  
406 increase HIV testing among GBMSM in Ghana and SSA countries, access still remains  
407 affected by cost and location of facilities for some GBMSM [3, 4]. Some participants  
408 indicated that they could not afford to travel to the location where they can access HIV  
409 testing, others said they could not pay for HIV testing nearby. Therefore, emphasizing the  
410 urgent need to continue to increase support for programs that provide targeted HIV testing  
411 services to GBMSM free of charge. The issue of location and travelling can also be

412 remedied by using newly available HIV self-testing which was recently introduced in  
413 Ghana [15, 38]. HIV self-testing, if implemented through existing peer networks, can  
414 provide ease access to GBMSM irrespective of their locations [15].

415 We implore researchers to consider the following limitations in interpreting our  
416 findings. As typical of nonprobability sampling, the convenience and snowball sampling  
417 used in the data collection limits its generatability for GBMSM in Ghana [39]. We also  
418 recruited GBMSM specific to Accra and Kumasi, the two largest urban settings in Ghana,  
419 thus findings may not represent other localities in Ghana. Additionally, this study was  
420 conducted to inform the development of an intervention to address intersectional stigma  
421 and increase HIV testing, thus limiting the scope to testing and no other aspects of care  
422 [12]. Hence, the findings should be used in addition to others findings on HIV testing  
423 among GBMSM in the geographical region. Nonetheless, the study provides an updated  
424 important insight to barriers, motivators and facilitators of HIV testing, which when  
425 considered will help in understanding ways to increase access to HIV testing among  
426 GBMSM in Ghana and ultimately helping Ghana reach its 95 95 95 HIV targets.

427

## 428 **References**

- 429 1. Kloek, M., et al., HIV prevalence among men who have sex with men, transgender  
430 women and cisgender male sex workers in sub-Saharan Africa: a systematic review  
431 and meta-analysis. *Journal of the International AIDS Society*, 2022. 25(11): p. e26022
- 432 2. Stannah, J., et al., Trends in HIV testing, the treatment cascade, and HIV incidence  
433 among men who have sex with men in Africa: A systematic review and meta-  
434 regression analysis. *medRxiv*, 2022: p. 2022.11. 14.22282329.

- 435 3. UNAIDS, Dangerous inequalities: World AIDS Day report 2022. 2022, Joint United  
436 Nations Programme on HIV/AIDS: Geneva, Switzerland.
- 437 4. Ali, H., et al., Ghana's HIV epidemic and PEPFAR's contribution towards epidemic  
438 control. Ghana medical journal, 2019. 53(1): p. 59-62.
- 439 5. Baral, S.D., et al., Male sex workers: Practices, contexts, and vulnerabilities for HIV  
440 acquisition and transmission. The Lancet, 2015. 385(9964): p. 260-273.
- 441 6. Baral, S.D., et al., The epidemiology of HIV among men who have sex with men in  
442 countries with generalized HIV epidemics. Current Opinion in HIV and AIDS, 2014.  
443 9(2): p. 156-167.
- 444 7. Poteat, T., et al., HIV prevalence and behavioral and psychosocial factors among  
445 transgender women and cisgender men who have sex with men in 8 African countries:  
446 A cross-sectional analysis. PLoS medicine, 2017. 14(11): p. e1002422.
- 447 8. Lyons, C.E., et al., Associations between punitive policies and legal barriers to  
448 consensual same-sex sexual acts and HIV among gay men and other men who have  
449 sex with men in sub-Saharan Africa: a multicountry, respondent-driven sampling  
450 survey. The Lancet HIV, 2023.
- 451 9. Gyamerah, A.O., et al., Stigma, discrimination, violence, and HIV testing among men  
452 who have sex with men in four major cities in Ghana. AIDS care, 2020. 32(8): p. 1036-  
453 1044.
- 454 10. Saalim, K., et al., multi-level manifestations of sexual stigma among men with same-  
455 gender sexual experience in Ghana. BMC Public Health, 2023. 23(1): p. 166.
- 456 11. Abubakari, G.M.R., et al., HIV Education, Empathy, and Empowerment (HIVE3): A  
457 Peer Support Intervention for Reducing Intersectional Stigma as a Barrier to HIV

- 458 Testing among Men Who Have Sex with Men in Ghana. *International Journal of*  
459 *Environmental Research and Public Health*, 2021. 18(24): p. 13103.
- 460 12. Nelson, L.E., Laura Nyblade, Kwasi Torpey, Carmen Logie, Han-Zhu Qian, Adom  
461 Manu, Emma Gyamerah, Francis Boakye, Patrick Appiah, DeAnne Turner, Melissa  
462 Stockton, Gamji M. Abubakari, David Vlahov, Multi-level Intersectional Stigma  
463 Reduction Intervention to Increase HIV Testing among Men who have Sex with Men  
464 in Ghana: A Cluster Randomized Controlled Trial Protocol. *PLoS One*, 2021. 16(11),  
465 e0259324.
- 466 13. Abubakari GM, Turner D, Nelson LE, Odhiambo AJ, Boakye F, Manu A, Torpey K,  
467 Wilton L. An application of the ADAPT-ITT model to an evidence-based behavioral  
468 HIV prevention intervention for men who have sex with men in Ghana. *International*  
469 *Health Trends and Perspectives*. 2021 Apr 4;1(1):1-6.
- 470 14. Nelson LE, Wilton L, Agyarko-Poku T, Zhang N, Aluoch M, Thach CT, Owiredu,  
471 Hanson S, Adu-Sarkodie Y. (2015). The association of HIV stigma and HIV/STD  
472 knowledge with sexual risk behaviours among adolescent and adult men who have  
473 sex with men in Ghana, West Africa. *Research in Nursing & Health*, 38(3):194–206
- 474 15. Abubakari GM, Turner D, Ni Z, Conserve DF, Dada D, Otchere A, Amanfoh Y, Boakye  
475 F, Torpey K, Nelson LE. Community-based interventions as opportunities to increase  
476 HIV self-testing and linkage to care among men who have sex with men—lessons from  
477 Ghana, West Africa. *Frontiers in Public Health*. 2021 Jun 11;9:660256.
- 478 16. LaRon EN, Ogunbajo A, Abu-Ba'are GR, Conserve DF, Wilton L, Ndenkeh JJ,  
479 Braitstein P, Dow D, Arrington-Sanders R, Appiah P, Tucker J. Using the  
480 Implementation Research Logic Model as a Lens to View Experiences of

- 481 Implementing HIV Prevention and Care Interventions with Adolescent Sexual Minority  
482 Men—A Global Perspective. *AIDS and behavior*. 2022.
- 483 17. Paschen-Wolff, M.M., et al., A systematic review of interventions that promote  
484 frequent HIV testing. *AIDS and Behavior*, 2019. 23: p. 860-874.
- 485 18. DiNenno, E.A., et al., Evaluating the evidence for more frequent than annual HIV  
486 screening of gay, bisexual, and other men who have sex with men in the United States:  
487 results from a systematic review and CDC expert consultation. *Public Health Reports*,  
488 2018. 133(1): p. 3-21.
- 489 19. Stannah, J., et al., HIV testing and engagement with the HIV treatment cascade  
490 among men who have sex with men in Africa: a systematic review and meta-analysis.  
491 *The lancet HIV*, 2019. 6(11): p. e769-e787.
- 492 20. Stangl, A.L., et al., The health stigma and discrimination framework: a global,  
493 crosscutting framework to inform research, intervention development, and policy on  
494 health-related stigmas. *BMC medicine*, 2019. 17(1): p. 1-13.
- 495 21. Atuguba, R.A., Homosexuality in Ghana: Morality, law, human rights. *J. Pol. & L.*,  
496 2019. 12: p. 113.
- 497 22. Matlapeng, K.M., G.B. Babatunde, and O. Akintola, Acceptability and accessibility of  
498 HIV testing and treatment among men who have sex with men in Botswana. *African*  
499 *Journal of AIDS Research*, 2022. 21(3): p. 261-269.
- 500 23. Nyblade L, Stockton MA, Saalim K, Rabiou Abu-Ba'are G, Clay S, Chonta M, Dada D,  
501 Mankattah E, Vormawor R, Appiah P, Boakye F. Using a mixed-methods approach to  
502 adapt an HIV stigma reduction intervention to address intersectional stigma faced by

- 503 men who have sex with men in Ghana. *Journal of the International AIDS Society*. 2022  
504 Jul;25:e25908.
- 505 24. Smith, A.D., et al., Men who have sex with men and HIV/AIDS in sub-Saharan Africa.  
506 *The Lancet*, 2009. 374(9687): p. 416-422.
- 507 25. Duvall, S., et al., Assessment of policy and access to HIV prevention, care, and  
508 treatment services for men who have sex with men and for sex workers in Burkina  
509 Faso and Togo. *JAIDS Journal of Acquired Immune Deficiency Syndromes*, 2015. 68:  
510 p. S189-S197.
- 511 26. Beyrer, C., et al., Global epidemiology of HIV infection in men who have sex with men.  
512 *The Lancet*, 2012. 380(9839): p. 367-377.
- 513 27. Tan, Rayner Kay Jin, Weiming Tang, and Joseph D. Tucker. "Public health services  
514 and intersectional stigma: a social sciences perspective with implications for HIV  
515 service design and delivery." *Current Opinion in HIV and AIDS* 18.1 (2023): 18-26.
- 516 28. Abubakari GM, Dada D, Nur J, Turner D, Otchere A, Tanis L, Ni Z, Mashoud IW,  
517 Nyhan K, Nyblade L, Nelson LE. Intersectional stigma and its impact on HIV  
518 prevention and care among MSM and WSW in sub-Saharan African countries: a  
519 protocol for a scoping review. *BMJ open*. 2021 Aug 1;11(8):e047280.
- 520 29. Nicholls EJ, Samba P, McCabe L, Gafos M, Philips AN, Trelvelion R, Rodger AJ, Burns  
521 FM, Weatherburn P, Witzel TC. Experiences of and attitudes towards HIV testing for  
522 Asian, Black and Latin American men who have sex with men (MSM) in the SELPHI  
523 (HIV Self-Testing Public Health Intervention) randomized controlled trial in England  
524 and Wales: implications for HIV self-testing. *BMC Public Health*. 2022 Apr  
525 22;22(1):809.

- 526 30. Deblonde J, De Koker P, Hamers FF, Fontaine J, Luchters S, Temmerman M. Barriers  
527 to HIV testing in Europe: a systematic review. *European journal of public health*. 2010  
528 Aug 1;20(4):422-32..
- 529 31. Kapanda L, Jumbe V, Izugbara C, Muula AS. Healthcare providers' attitudes towards  
530 care for men who have sex with men (MSM) in Malawi. *BMC health services research*.  
531 2019 Dec;19:1-9.
- 532 32. Shaver J, Sullivan P, Siegler A, de Voux A, Phaswana-Mafuya N, Bekker LG, Baral  
533 SD, Wirtz AL, Beyrer C, Brown B, Stephenson R. Comparing provider and client  
534 preferences for HIV prevention services in South Africa among men who have sex  
535 with men. *Journal of the International Association of Providers of AIDS Care (JIAPAC)*.  
536 2017 Nov;16(6):562-71.
- 537 33. Abubakari GM, Nelson LE, Ogunbajo A, Boakye F, Appiah P, Odhiambo A, Sa T,  
538 Zhang N, Ngozi I, Scott A, Maina G. Implementation and evaluation of a culturally  
539 grounded group-based HIV prevention programme for men who have sex with men in  
540 Ghana. *Global public health*. 2021 Jul 3;16(7):1028-45.
- 541 34. Campbell CK, Lippman SA, Moss N, Lightfoot M. Strategies to increase HIV testing  
542 among MSM: a synthesis of the literature. *AIDS and Behavior*. 2018 Aug; 22:2387-  
543 412.
- 544 35. Pharr JR, Lough NL, Ezeanolue EE. Barriers to HIV testing among young men who  
545 have sex with men (MSM): experiences from Clark County, Nevada. *Global journal of*  
546 *health science*. 2016 Jul;8(7):9.
- 547 36. Lu Y, Ni Y, Li X, He X, Huang S, Zhou Y, Dai W, Wu D, Tucker JD, Shen G, Sha Y.  
548 Monetary incentives and peer referral in promoting digital network-based secondary



549 distribution of HIV self-testing among men who have sex with men in China: study  
550 protocol for a three-arm randomized controlled trial. BMC Public Health. 2020  
551 Dec;20(1):1-8.

552 37. Yan H, Zhang R, Wei C, Li J, Xu J, Yang H, McFarland W. A peer-led, community-  
553 based rapid HIV testing intervention among untested men who have sex with men in  
554 China: an operational model for expansion of HIV testing and linkage to care. Sexually  
555 transmitted infections. 2014 Aug 1;90(5):388-93.

556 38. Nagai H, Tagoe H, Tun W, Adii bokah E, Ankomah A, Rahman YA, Addo SA, Atuahene  
557 SK, Essandoh E, Kowalski M. Perspectives of policymakers on the introduction and  
558 scale-up of HIV self-testing and implication for national HIV programming in Ghana.  
559 Frontiers in Public Health. 2021 Sep 21;9:694836.

560 39. Abubakari MR, DiNicola K, Lee W. Empirical insights on technology use for navigating  
561 human services. Journal of Technology in Human Services. 2020 Jul 8;38(4):331-51.

562

563

564
